# Supplementary material for: Sulfated lignocellulose nanofibril supported flower-like BiOBr with oxygen vacancies towards absorption–photocatalytic synergetic removal of organic pollutants
Source: Royal Society of Chemistry journal article supplement (doi:10.1039/d3nj05486a), 2024-01-01

## Supplementary Information

### Sulfated lignocellulose nanofibril supported flower-like BiOBr with oxygen vacancies towards absorption-photocatalytic synergetic removal of organic pollutants

Xin Zhou <sup>a</sup>, Yanming Liu <sup>a</sup>, Xiuyu Liu <sup>a</sup>, Mengxing Xu <sup>a</sup>, Ji Shi <sup>\*a</sup> and Qin Huang <sup>\*a</sup>

<sup>a</sup> School of Chemistry and Chemical Engineering, Key Laboratory of Chemistry and Engineering of Forest Products of the National Ethnic Affairs Commission, Guangxi Key Laboratory of Chemistry and Engineering of Forest Products, Guangxi Collaborative Innovation Center for Chemistry and Engineering of Forest Products, Guangxi Minzu University, Nanning 530006, P.R. China

\*Corresponding Author: huangqin@gxun.edu.cn (Qin Huang); 20220233@gxmzu.edu.cn (Ji Shi).

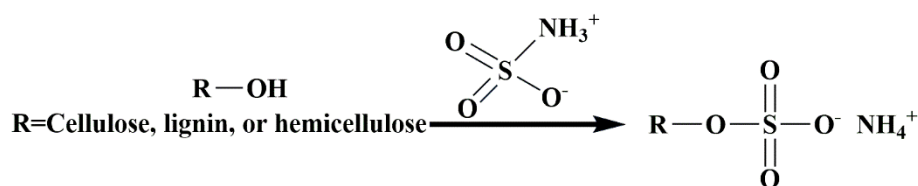

Fig. S1 The reaction between sulfamic acid and lignocellulosic components.

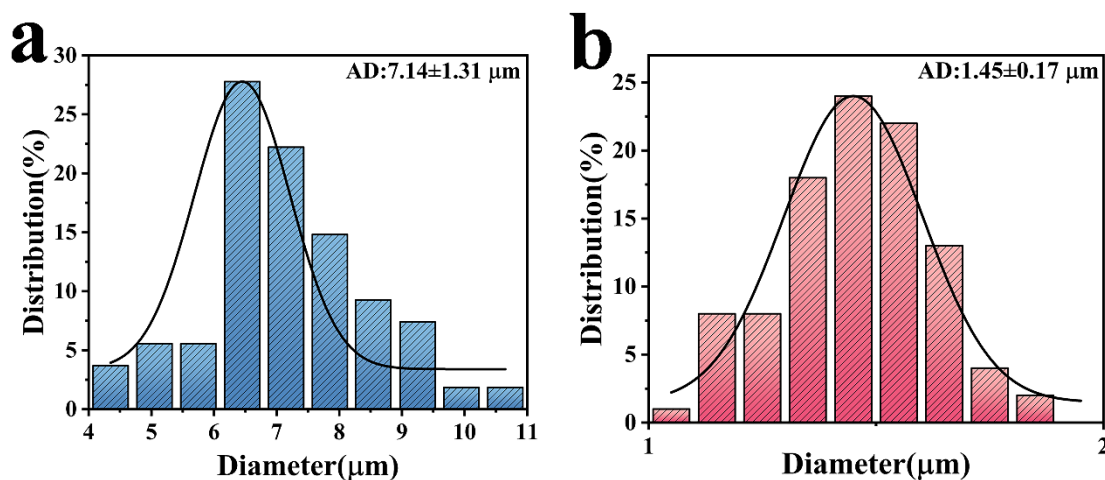

Fig. S2 The particle diameter distribution of BiOBr and BiOBr/SLCNF.

**Table. S1** The fitting parameters of different kinetics models.

| sample      | solution | Pseudo-first-order model |                            |        | Pseudo-second-order model |                            |        |
|-------------|----------|--------------------------|----------------------------|--------|---------------------------|----------------------------|--------|
|             |          | $q_e$ (mg/g)             | $k_1$ (min <sup>-1</sup> ) | $R^2$  | $q_e$ (mg/g)              | $k_2$ (min <sup>-1</sup> ) | $R^2$  |
| BiOBr       | RhB      | 24.38                    | 0.2595                     | 0.9950 | 25.35                     | 0.0241                     | 0.9991 |
|             | TCH      | 3.81                     | 0.8666                     | 0.9909 | 3.89                      | 0.6430                     | 0.9999 |
| BiOBr/SLCNF | RhB      | 48.96                    | 2.5825                     | 0.9948 | 49.8                      | 0.1149                     | 0.9999 |
|             | TCH      | 8.78                     | 2.6033                     | 0.9983 | 8.87                      | 0.9170                     | 0.9999 |

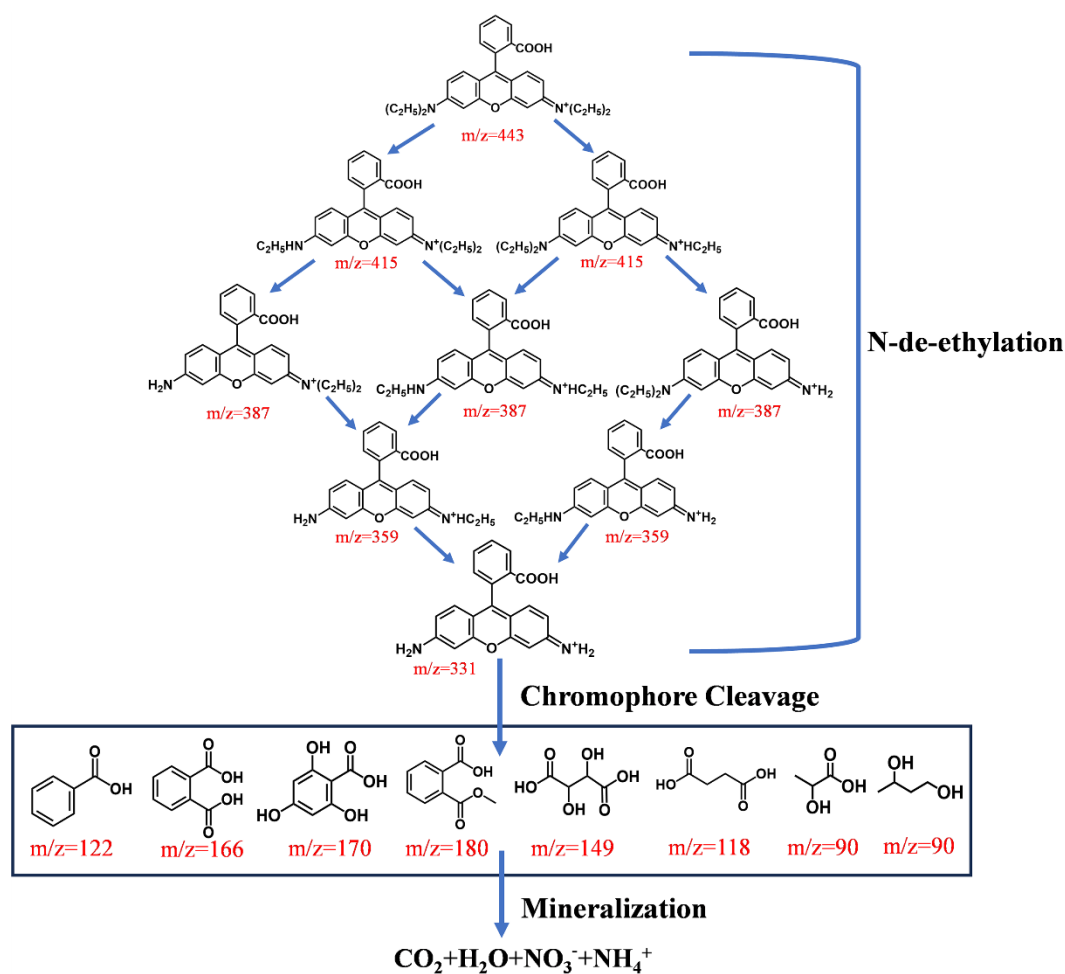

**Fig. S3** Possible degradation products of RhB after irradiation.

**Mass spectra of the degraded small intermediates:**

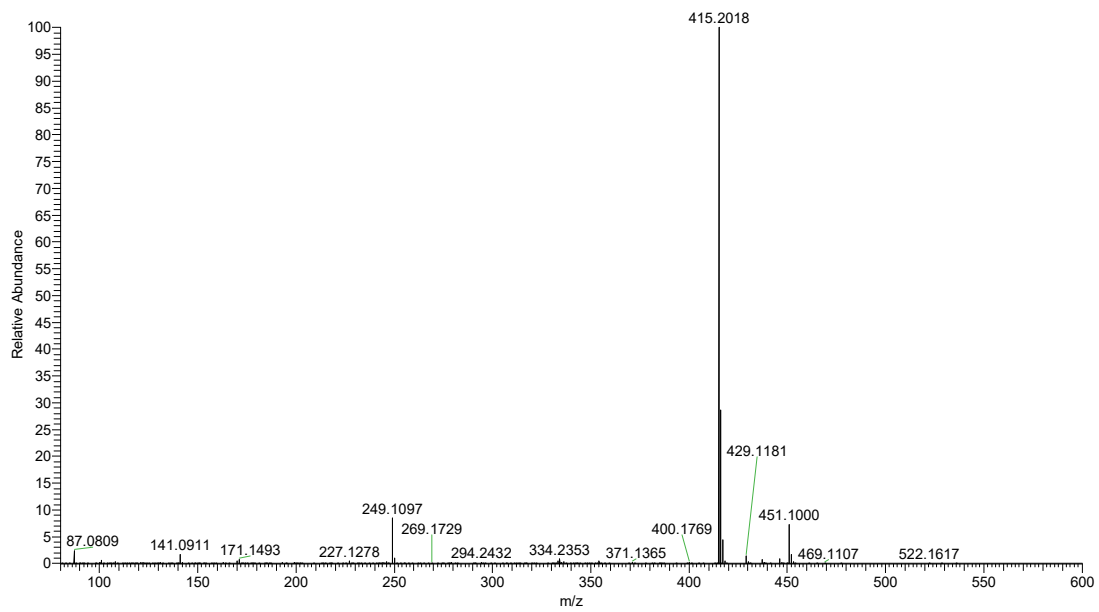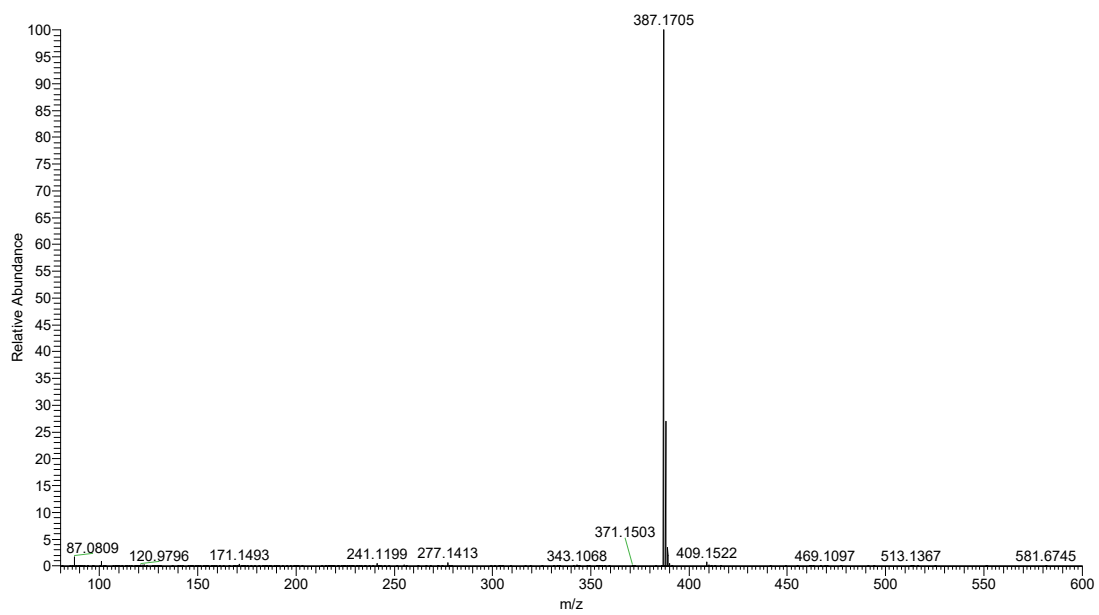

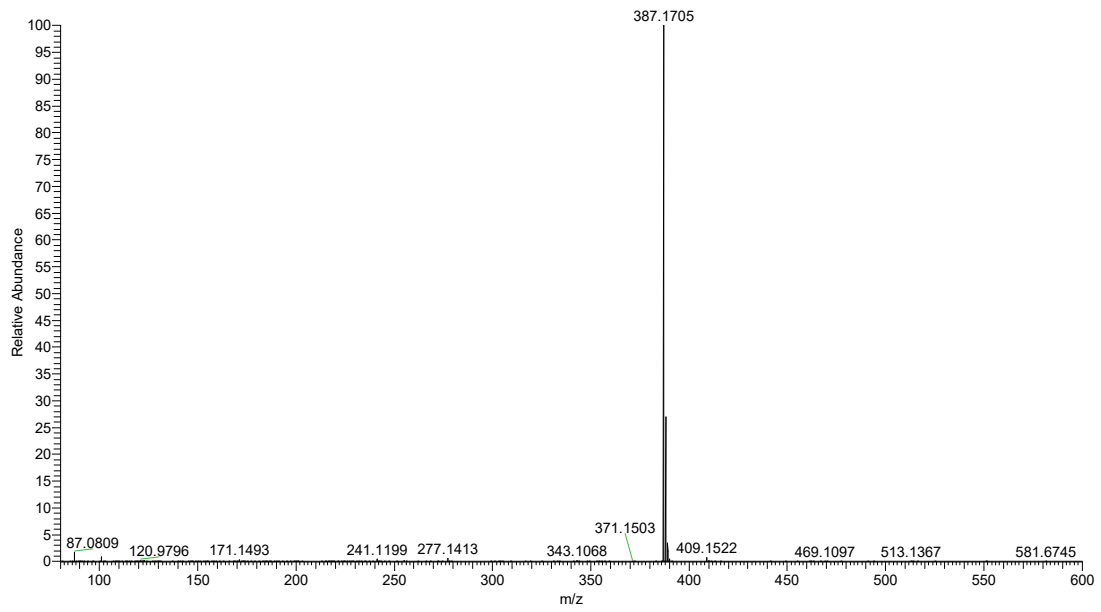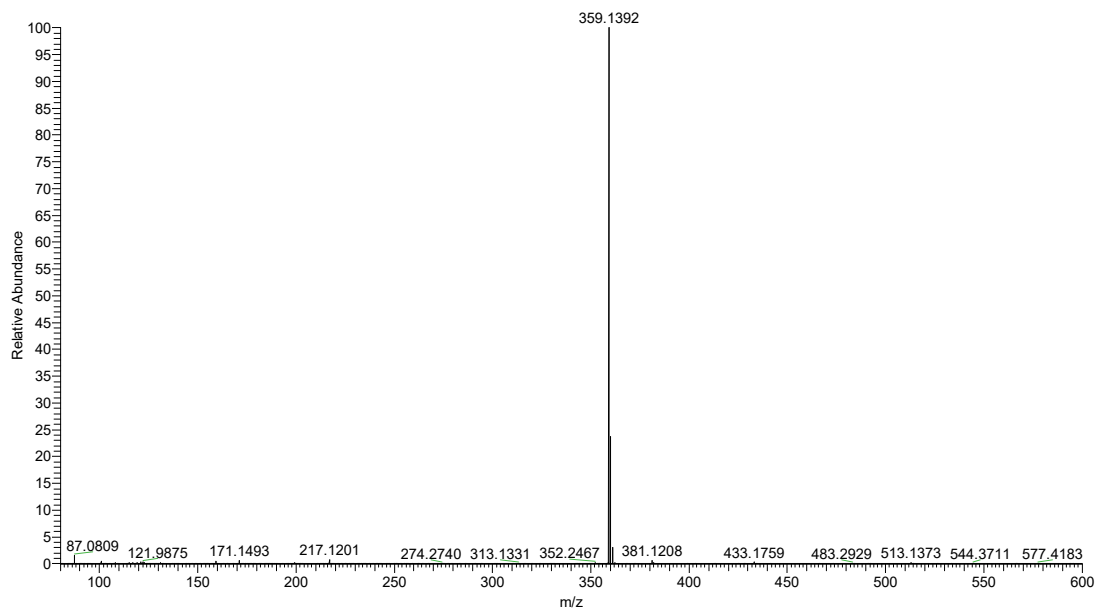

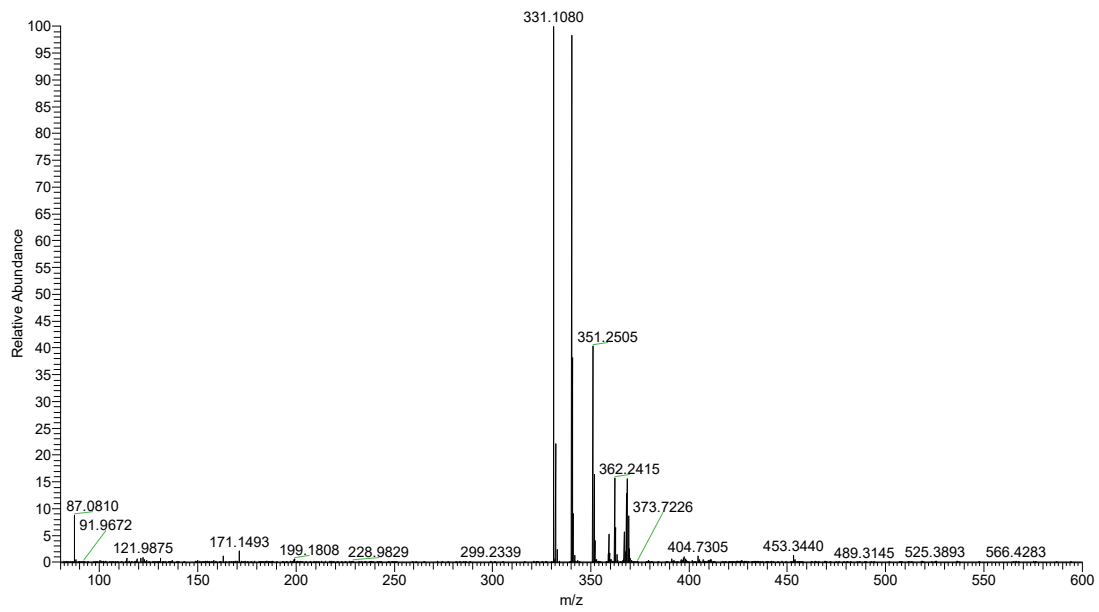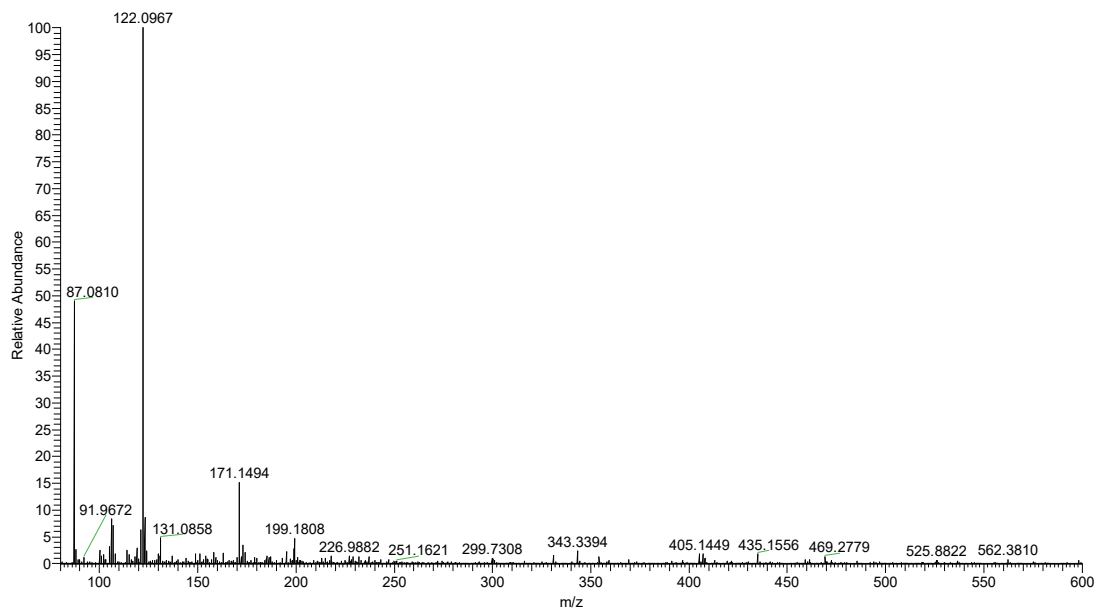

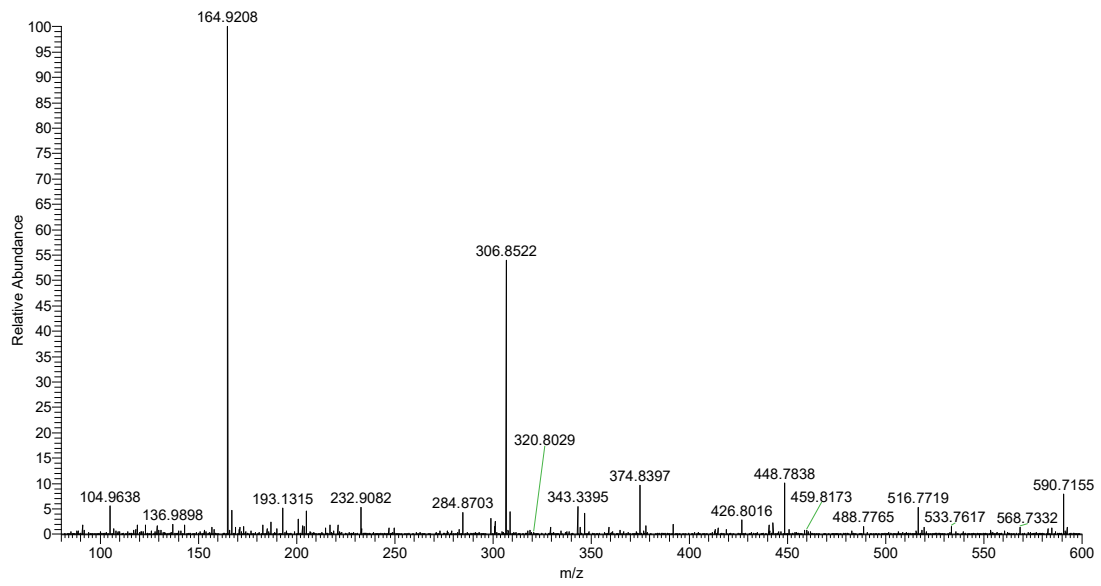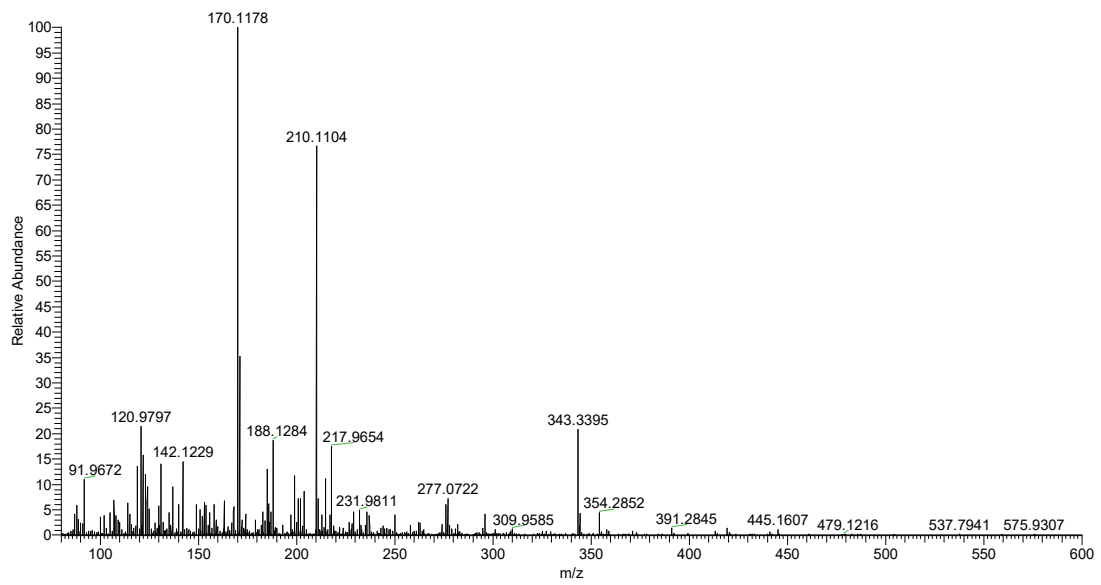

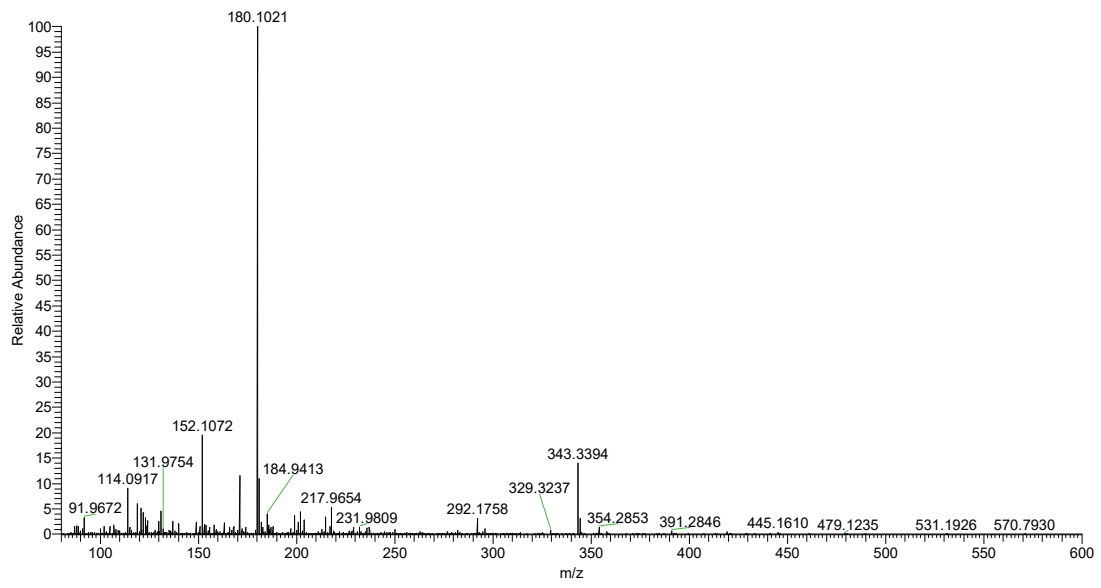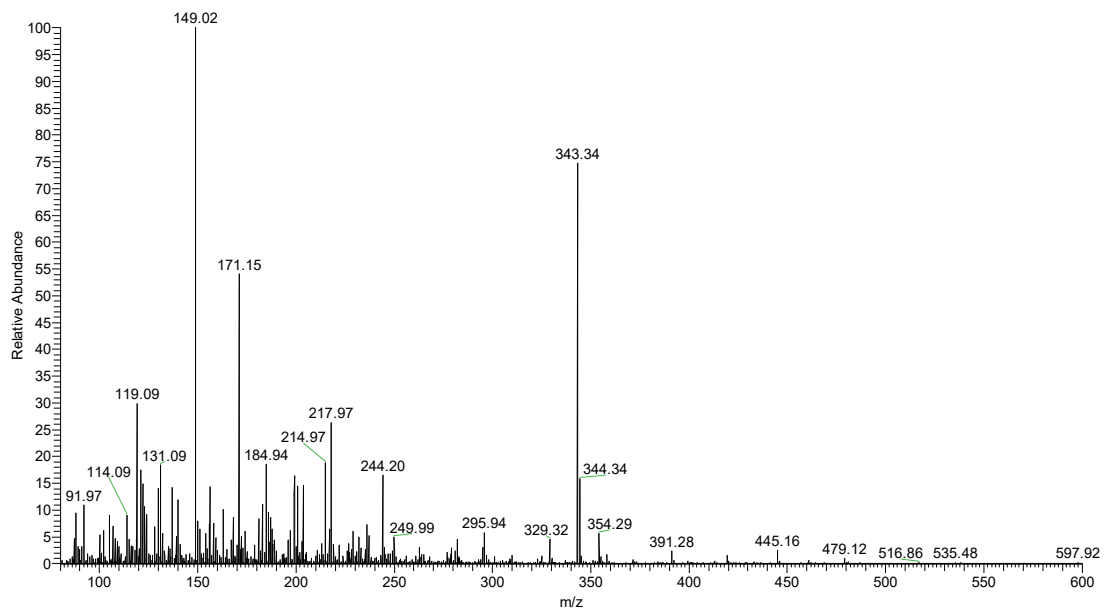

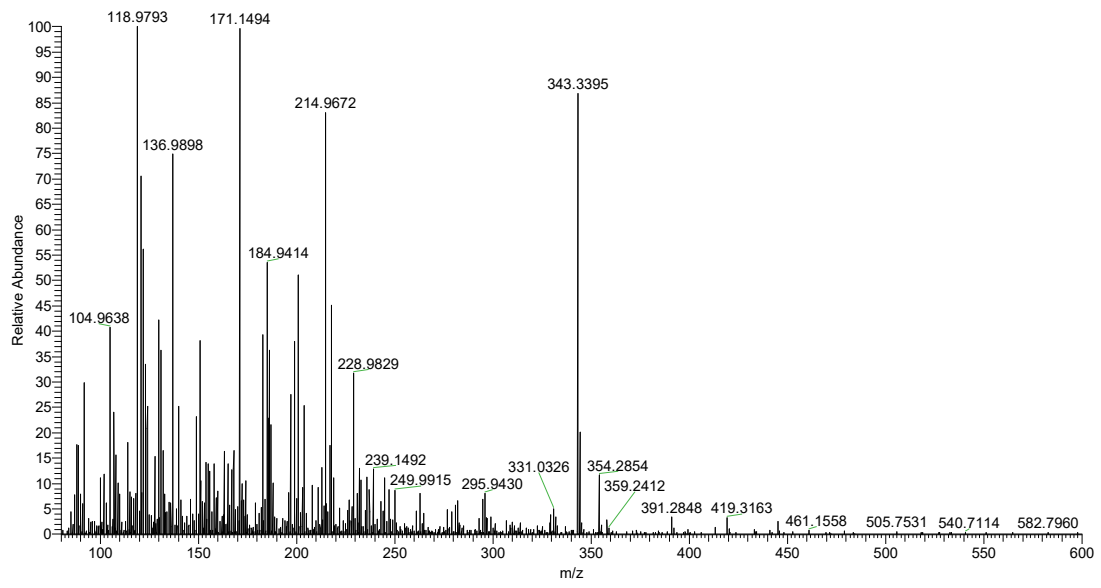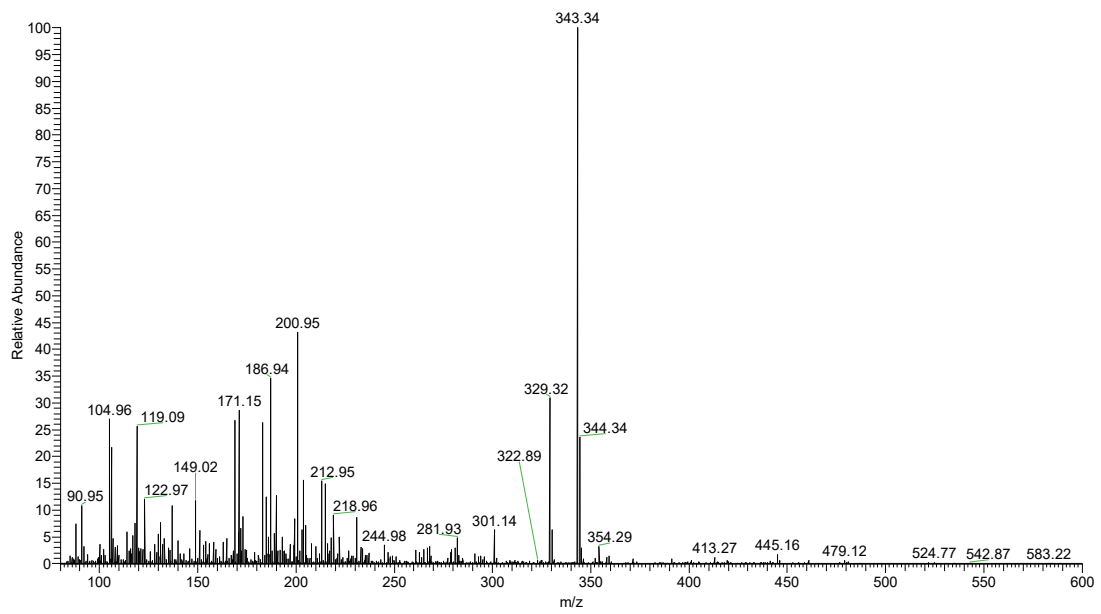

Supplement: d3nj05486a5.pdf [file d3nj05486a5.pdf]
