# Supplementary material for: Sulfated lignocellulose nanofibril supported flower-like BiOBr with oxygen vacancies towards absorption–photocatalytic synergetic removal of organic pollutants
Source: Royal Society of Chemistry journal article supplement (doi:10.1039/d3nj05486a), 2024-01-01

Electronic Supplementary Material (ESI) for New Journal of Chemistry.

This journal is © The Royal Society of Chemistry and the Centre National de la Recherche Scientifique 2024

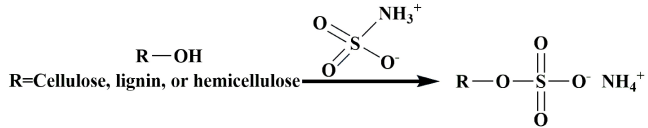

Supplement: d3nj05486a2.pdf [file d3nj05486a2.pdf]
