# Supplementary material for: Sulfated lignocellulose nanofibril supported flower-like BiOBr with oxygen vacancies towards absorption–photocatalytic synergetic removal of organic pollutants
Source: Royal Society of Chemistry journal article supplement (doi:10.1039/d3nj05486a), 2024-01-01
Supplement: d3nj05486a6.pdf [file d3nj05486a6.pdf]

**Table. S1** The fitting parameters of different kinetics models.

| sample      | solution | Pseudo-first-order model |                             |        | Pseudo-second-order model |                             |        |
|-------------|----------|--------------------------|-----------------------------|--------|---------------------------|-----------------------------|--------|
|             |          | $q_e$ (mg/g)             | $k_1$ ( $\text{min}^{-1}$ ) | $R^2$  | $q_e$ (mg/g)              | $k_2$ ( $\text{min}^{-1}$ ) | $R^2$  |
| BiOBr       | RhB      | 24.38                    | 0.2595                      | 0.9950 | 25.35                     | 0.0241                      | 0.9991 |
|             | TCH      | 3.81                     | 0.8666                      | 0.9909 | 3.89                      | 0.6430                      | 0.9999 |
| BiOBr/SLCNF | RhB      | 48.96                    | 2.5825                      | 0.9948 | 49.8                      | 0.1149                      | 0.9999 |
|             | TCH      | 8.78                     | 2.6033                      | 0.9983 | 8.87                      | 0.9170                      | 0.9999 |
