# Supplementary figures and images for: Sulfated lignocellulose nanofibril supported flower-like BiOBr with oxygen vacancies towards absorption–photocatalytic synergetic removal of organic pollutants
Source: Royal Society of Chemistry journal article supplement (doi:10.1039/d3nj05486a), 2024-01-01

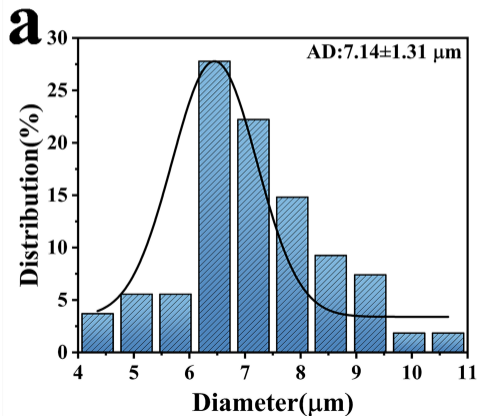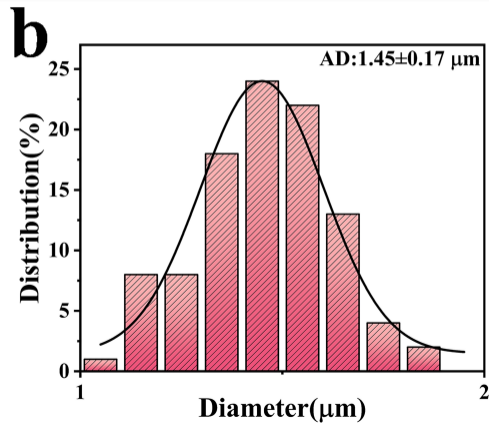

Supplement: d3nj05486a3.pdf [file d3nj05486a3.pdf]

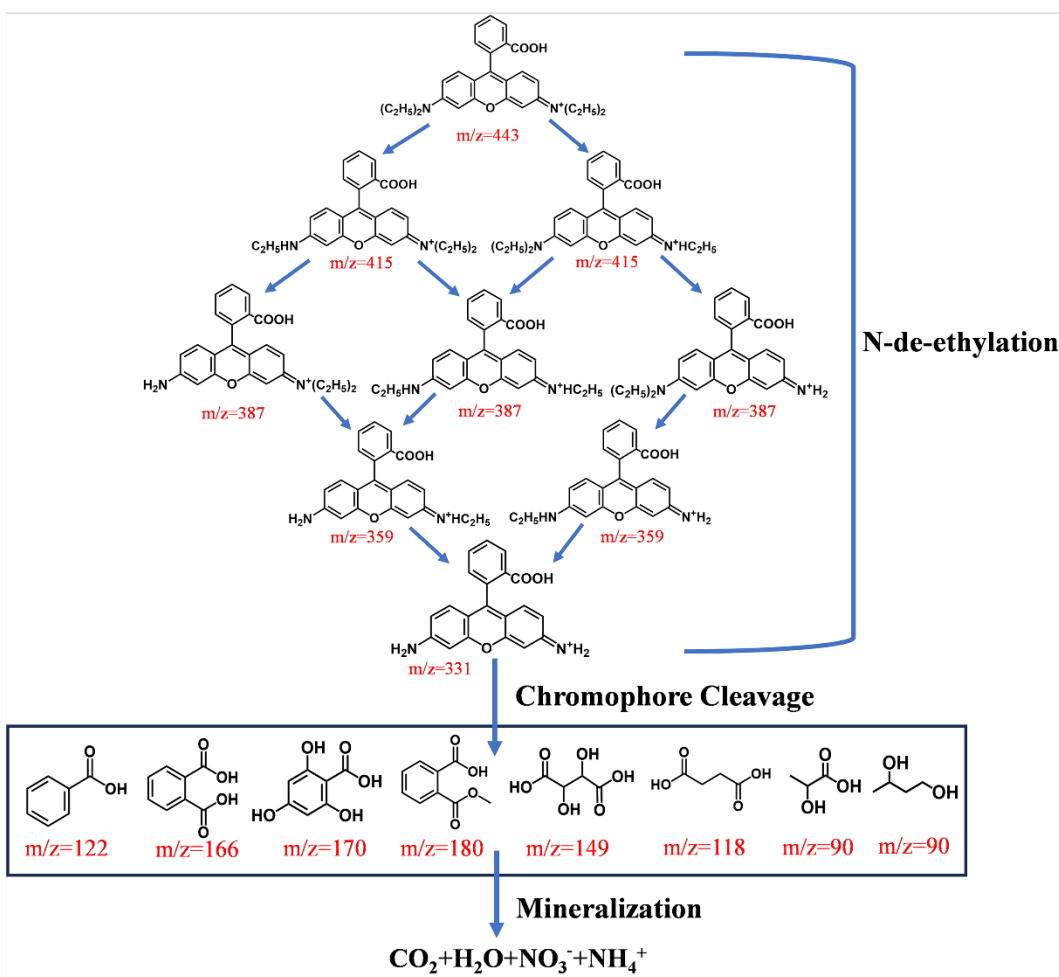

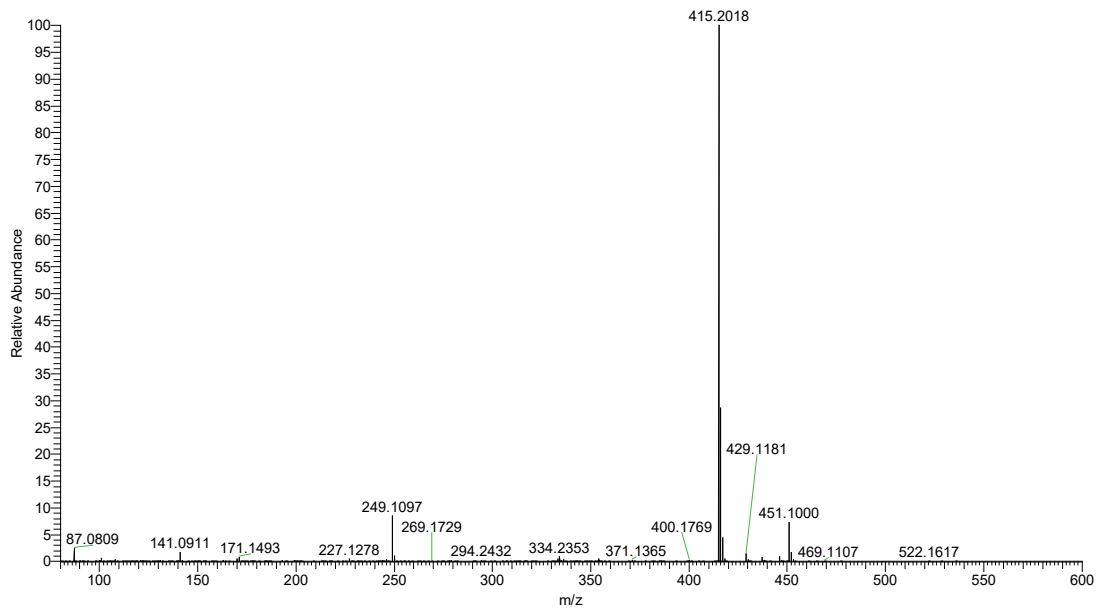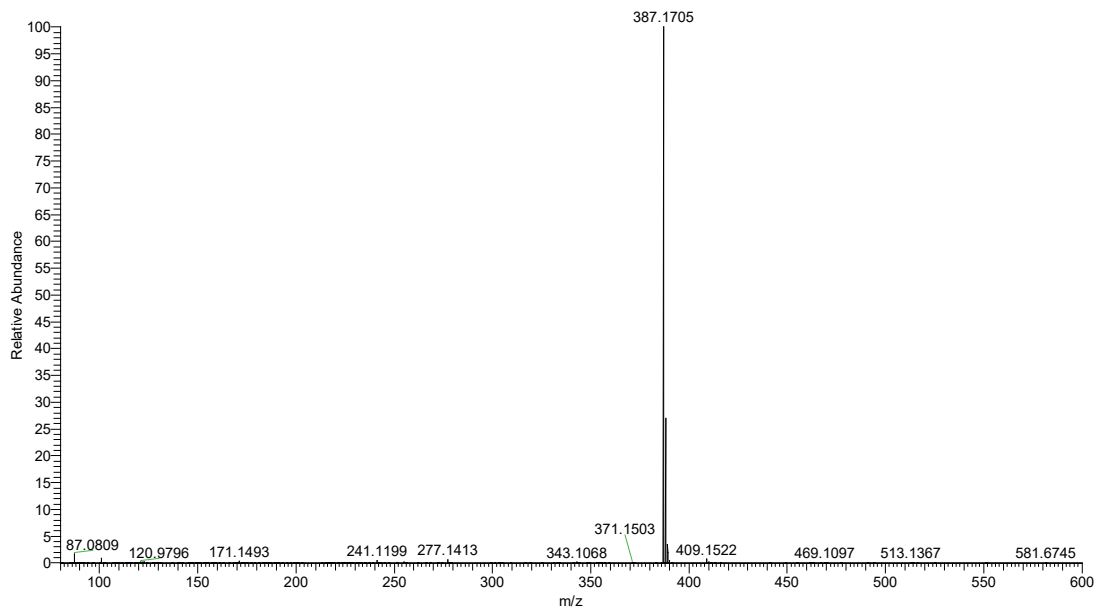

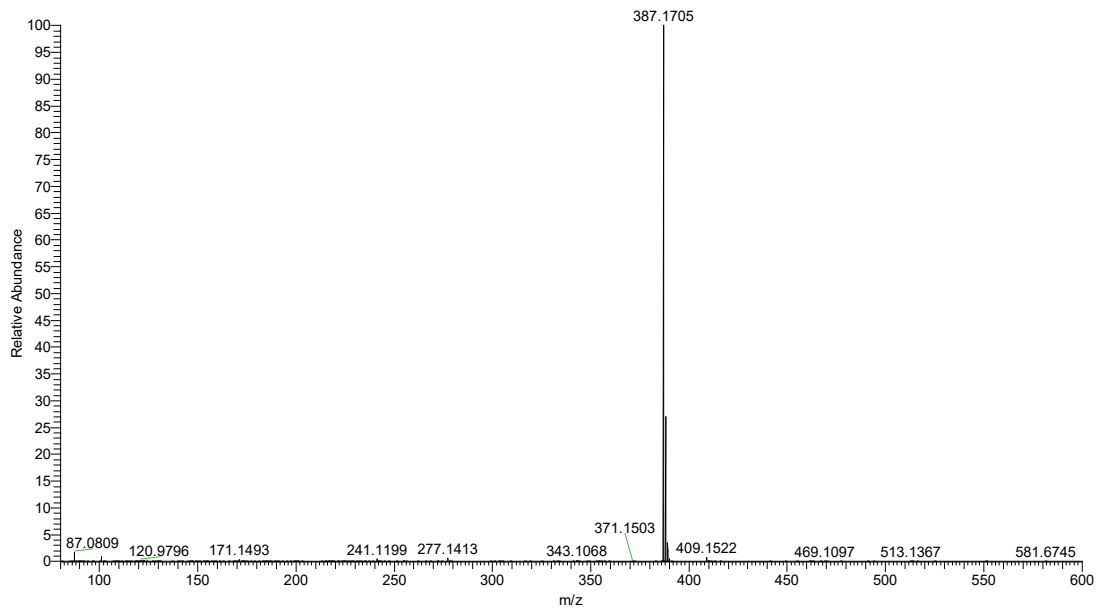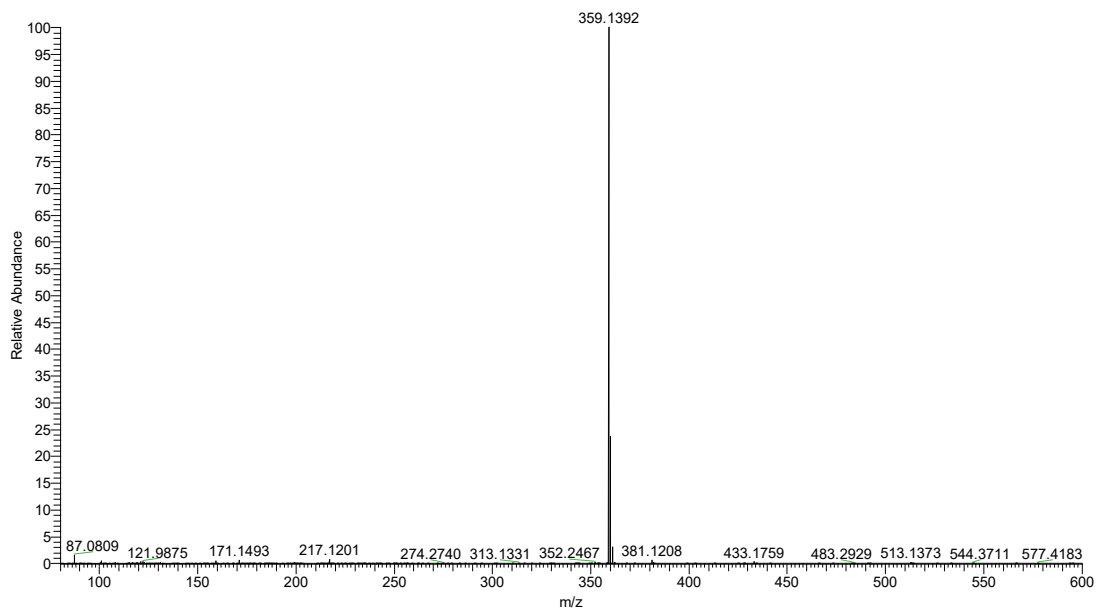

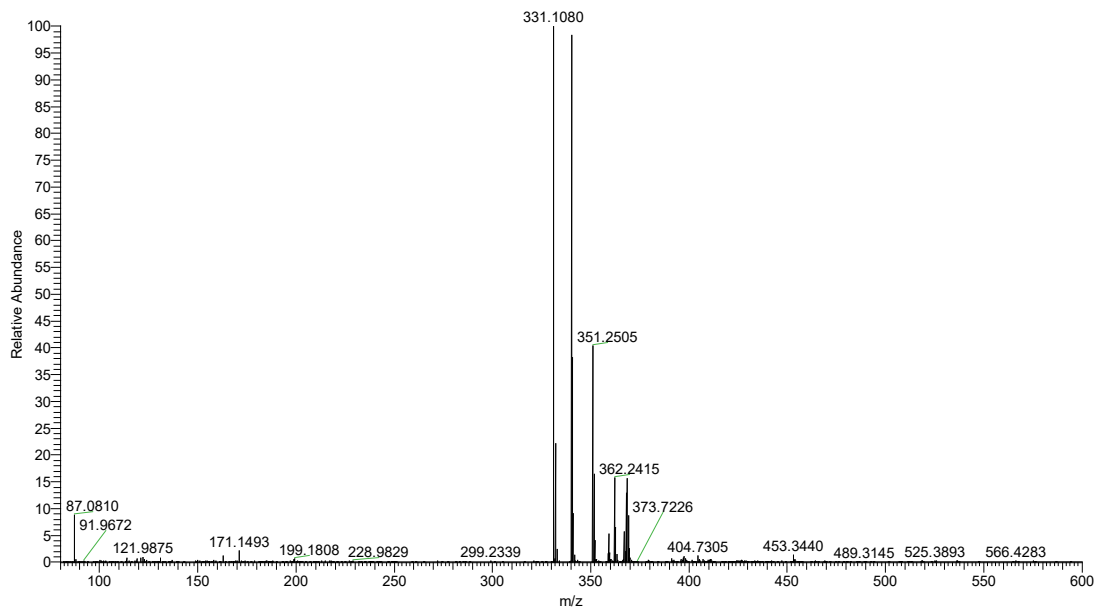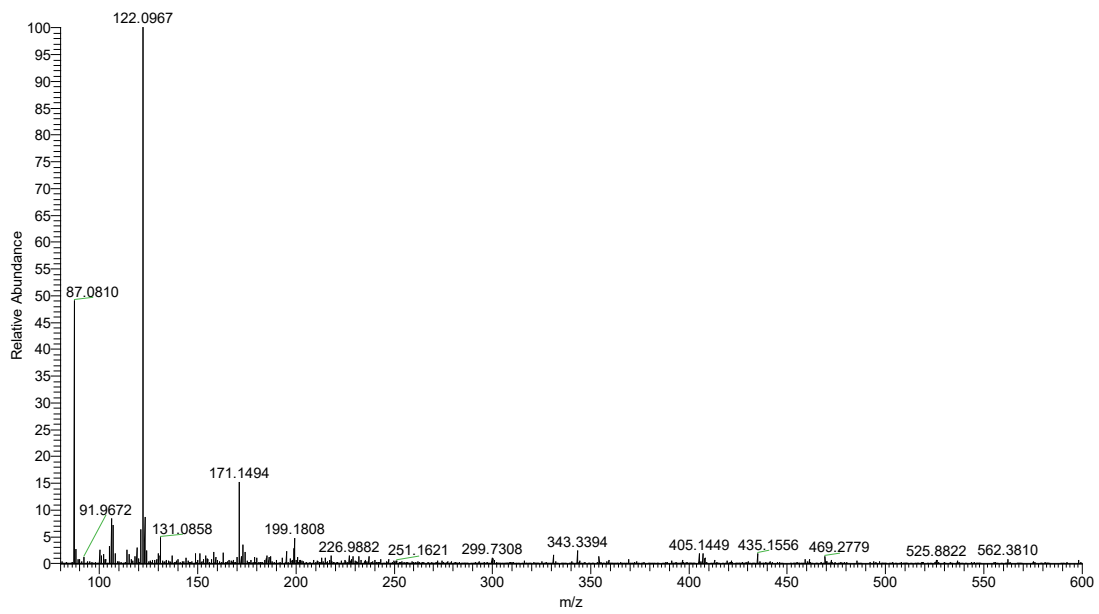

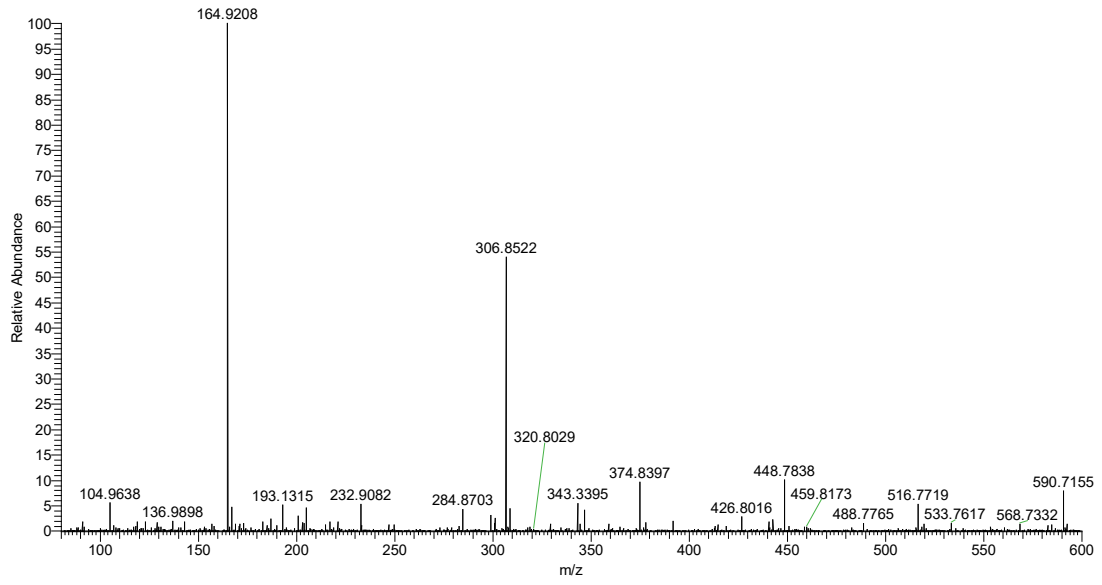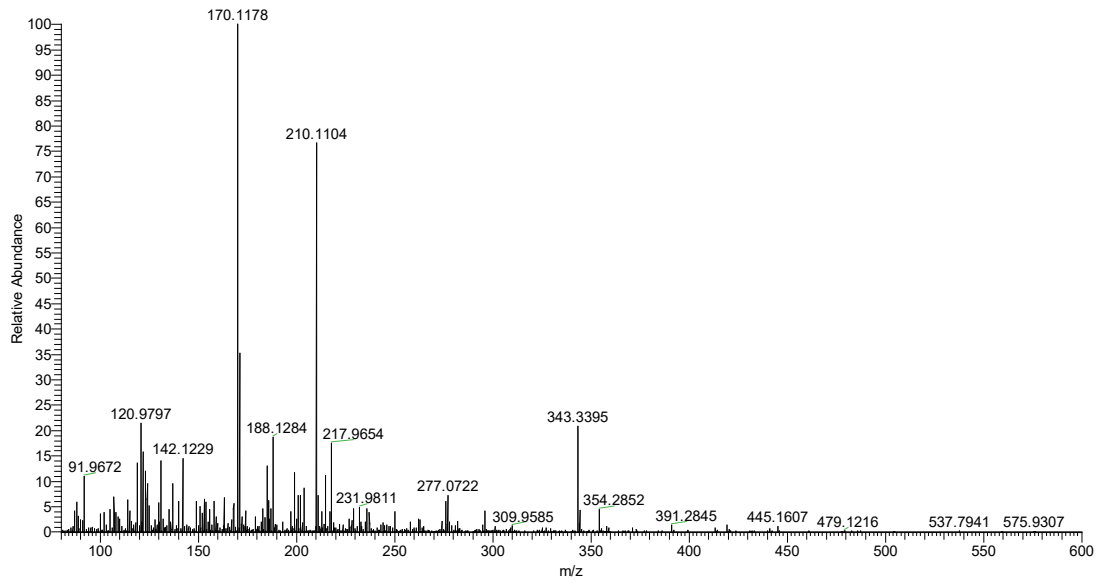

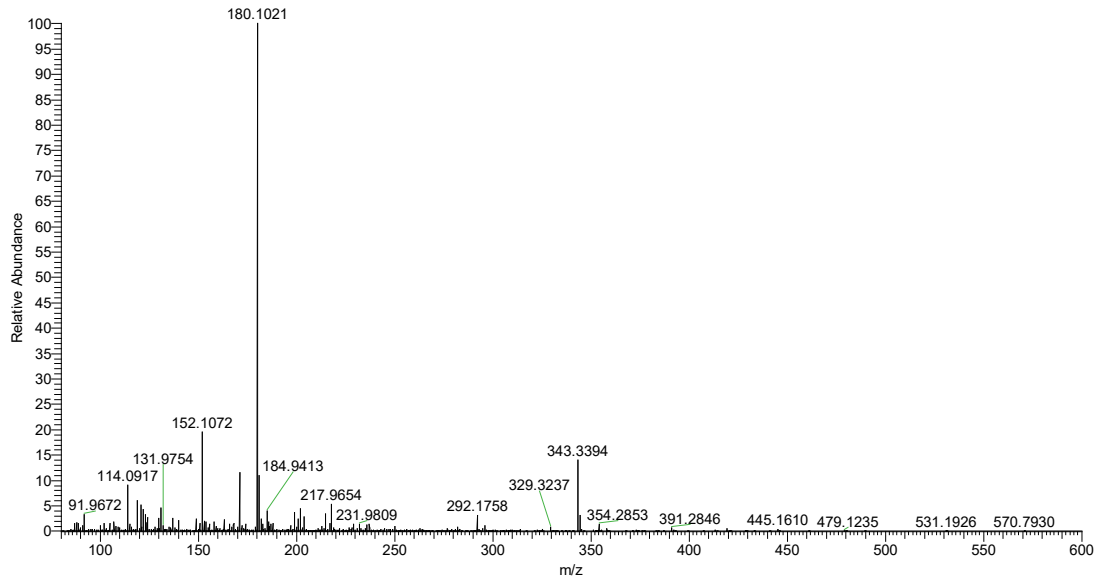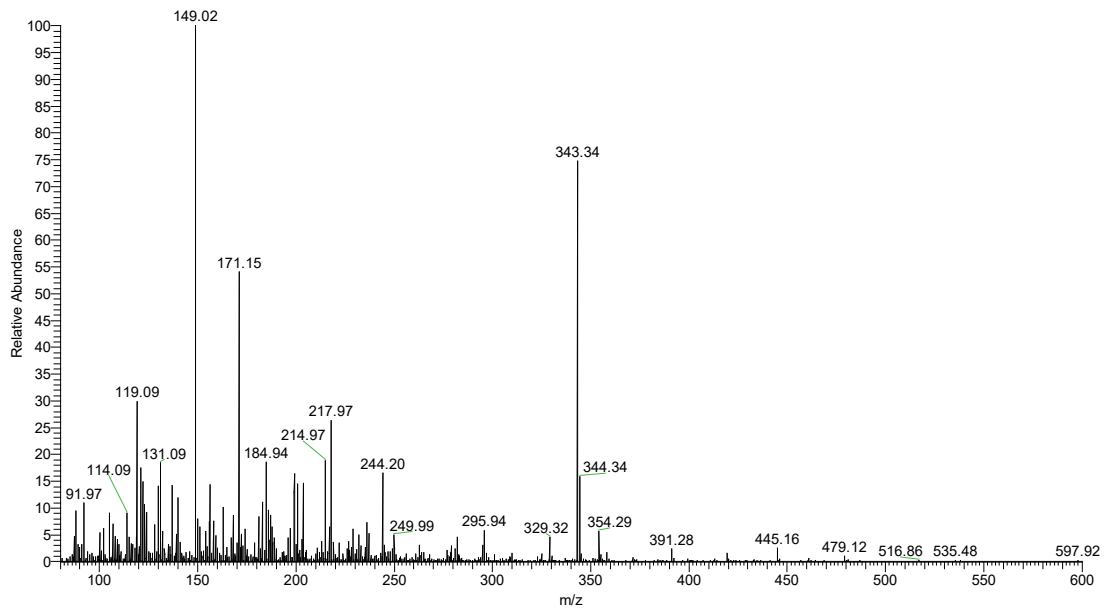

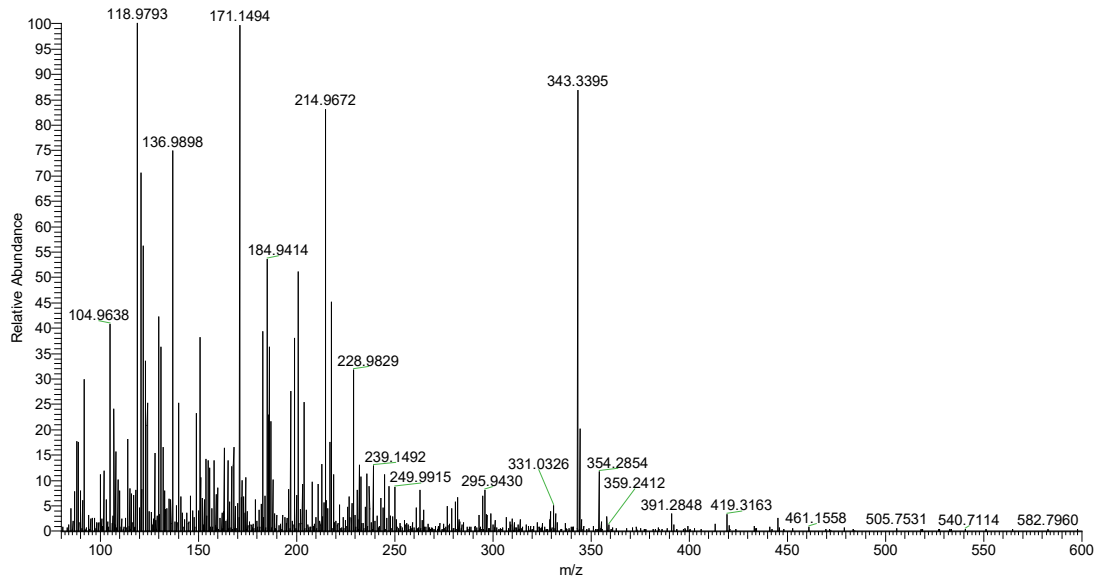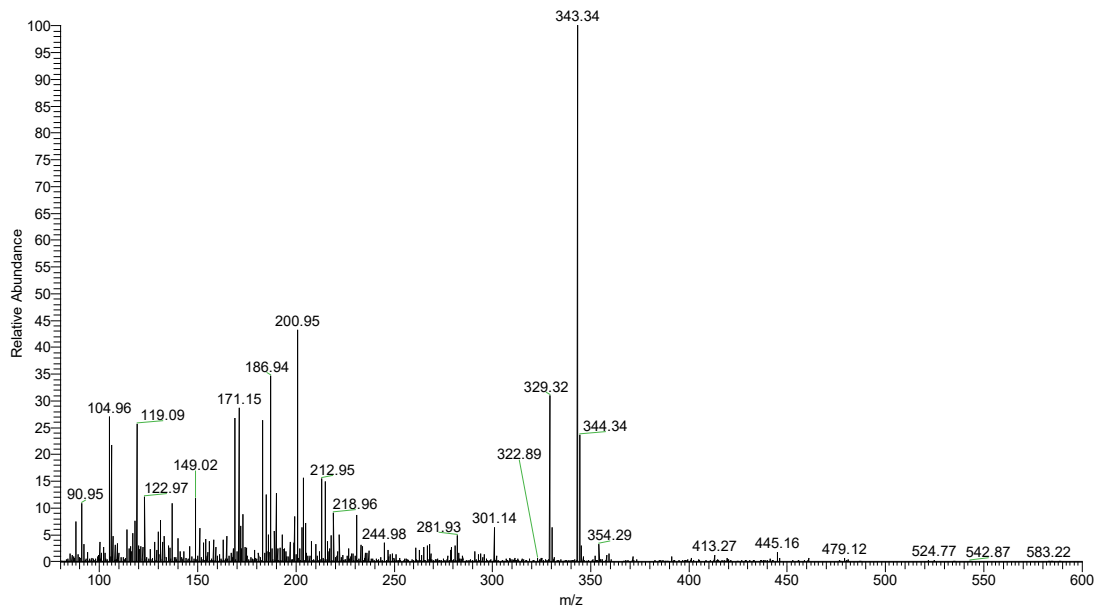

Supplement: d3nj05486a4.pdf [file d3nj05486a4.pdf]
